# Supplementary material
Source: publisher figshare collection journal article supplement (https://tandf.figshare.com/ndownloader/files/22295334)
Supplement: Supplementary file 1 [file 22295334]

Suppl. Table 2. Non-Behçet uveitis diagnoses in the control group that is compared to the patients with a definite diagnosis of Behçet disease uveitis in the retrospective study

| Diagnosis | Number of patients |
| --- | --- |
| Ocular toxoplasmosis | 24 |
| Sarcoidosis | 20 |
| Undefined (unknown) diagnosis | 20 |
| Multiple sclerosis-associated uveitis | 18 |
| HLA-B27-associated anterior uveitis | 13 |
| Ocular tuberculosis | 12 |
| Ankylosing spondylitis | 10 |
| Idiopathic intermediate uveitis | 10 |
| Pars planitis | 8 |
| Viral anterior uveitis / Keratouveitis | 7 |
| Fuchs uveitis syndrome | 6 |
| Latent tuberculosis-associated uveitis | 6 |
| Vogt-Koyanagi-Harada disease | 6 |
| Idiopathic uveitis | 6 |
| Idiopathic multifocal choroiditis | 5 |
| Eales disease | 4 |
| Spondyloarthropathy | 3 |
| Cytomegalovirus anterior uveitis | 3 |
| Serpiginous-like choroiditis | 3 |
| Idiopathic posterior uveitis | 3 |
| Psoriasis | 2 |
| Ocular syphilis | 2 |
| Acute retinal necrosis | 2 |
| Ocular bartonellosis | 2 |
| Idiopathic retinal vasculitis | 2 |
| Serpiginous choroiditis | 1 |
| Cytomegalovirus retinitis | 1 |
| Sympathetic ophthalmia | 1 |
| Birdshot retinochoroiditis | 1 |
| Systemic lupus erythematosus-associated posterior uveitis | 1 |
| Idiopathic chronic anterior uveitis | 1 |
| Inflammatory bowel disease-associated uveitis | 1 |
| Juvenile idiopathic arthritis-associated uveitis | 1 |
| Idiopathic panuveitis | 1 |
| Multiple evanescent white dot syndrome | 1 |
| Total | 207 |
